# Supplementary material for: Separation of gas mixtures using Co(ii) carborane-based porous coordination polymers
Source: Royal Society of Chemistry journal article supplement (doi:10.1039/b927499e), 2010-01-01
Supplement: b927499e.pdf [file b927499e.pdf]

## Supporting Information

### Separation of Gas Mixtures Using Co(II)-Carborane-Based Porous Coordination Polymers

Youn-Sang Bae,<sup>#a</sup> Alexander M. Spokoyny,<sup>#b</sup> Omar K. Farha,<sup>#b</sup> Randall Q. Snurr,<sup>\*a</sup>

Joseph T. Hupp<sup>\*b</sup> and Chad A. Mirkin<sup>\*b</sup>

<sup>a</sup> *Department of Chemical and Biological Engineering, Northwestern University, 2145 Sheridan Road, Evanston, Illinois 60208.*

E-mail: [snurr@northwestern.edu](mailto:snurr@northwestern.edu)

<sup>b</sup> *Department of Chemistry and International Institute for Nanotechnology, Northwestern University, 2145 Sheridan Road, Evanston, Illinois 60208.*

E-mail: [chadnano@northwestern.edu](mailto:chadnano@northwestern.edu); [j-hupp@northwestern.edu](mailto:j-hupp@northwestern.edu)

# *These authors contributed equally to this work.*

## Experimental

Carborane precursor **1** was purchased from KatChem (Czech Republic) and used as received. All other chemicals and solvents were purchased from the Aldrich Chemical Company and used without further purification. Ligand **2** and materials **3** and **4** were made according to previously published methods.<sup>1</sup> Material **3** in this paper is material **2** in reference 1, and Material **4** in this paper is material **3** in reference 1. **3a** and **4a** were obtained by thermal activation of **3** and **4** at 300°C under dynamic vacuum for 12 h. **4b** was obtained by heating **4** at 120°C under dynamic vacuum for 12 h.

Adsorption measurements of CO<sub>2</sub>, CH<sub>4</sub>, O<sub>2</sub> and N<sub>2</sub> were done volumetrically at 298 K up to 17 bar on samples of 50-70 mg. All gases were 99.9% purity or higher obtained from Airgas, Inc. Equilibrium pressures were measured with an MKS Baratron transducer 627B (accuracy +/- 0.12%). Adsorbate gas was dosed in increments, and equilibrium was assumed when no further change in pressure was observed (within 0.01 kPa).

Magnetization was measured with a commercial Quantum Design MPMS SQUID magnetometer (5 Tesla magnet).

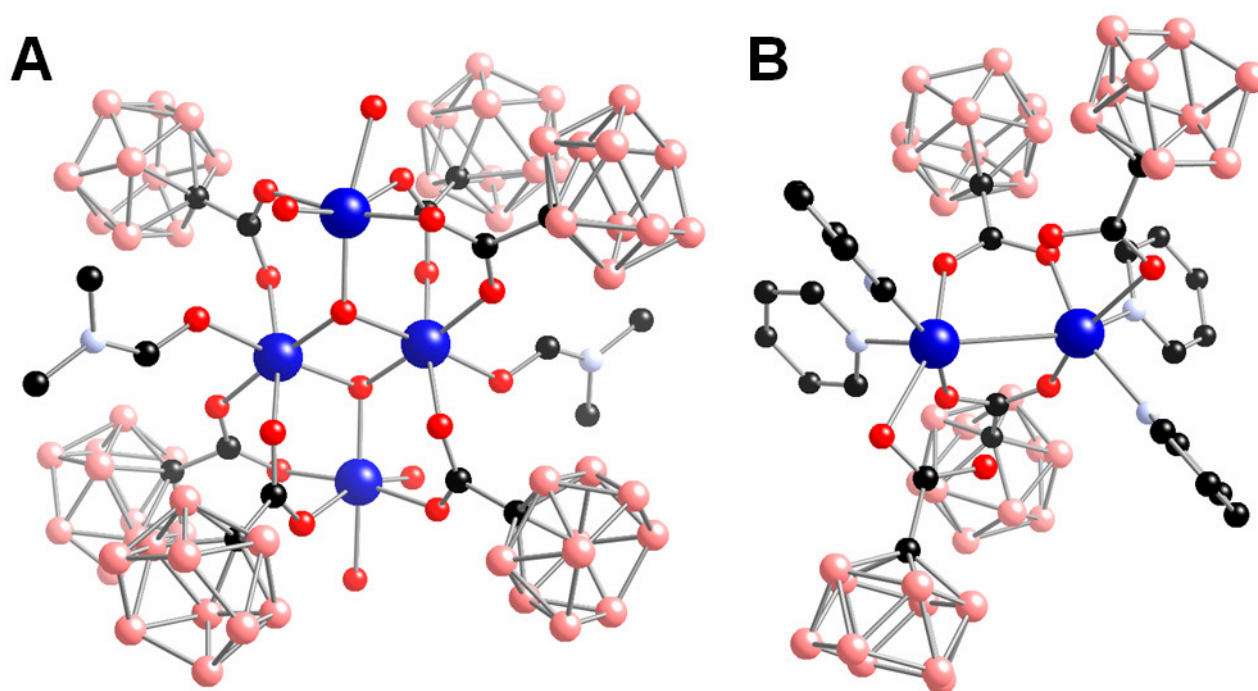

**Figure S1.** Coordination environments within (a) **3** and (b) **4**, respectively. Cobalt atoms are dark blue, oxygens are red, carbons are black, nitrogens are light blue and borons are beige (made by CrystalMaker 2.2).

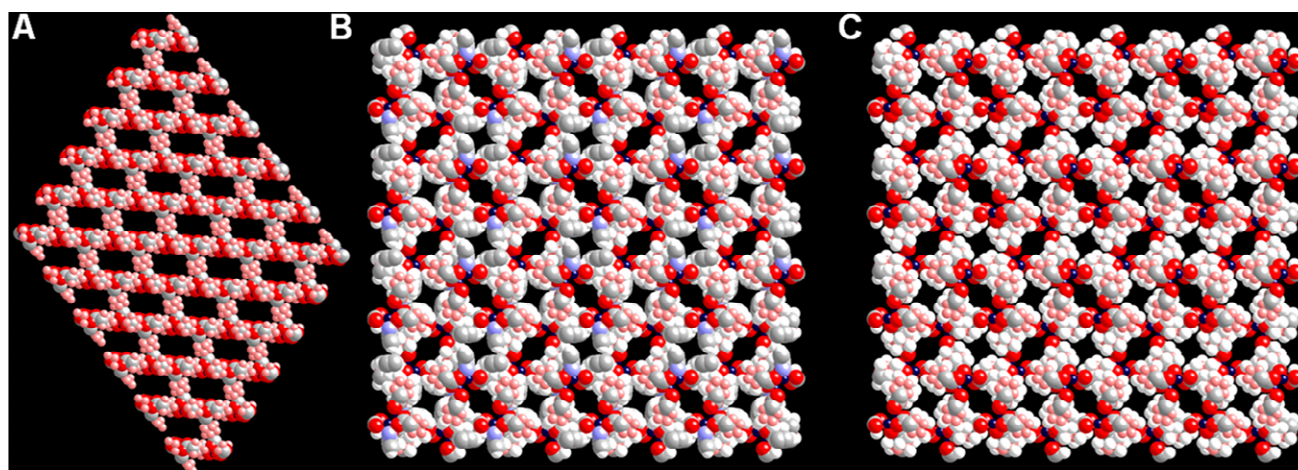

**Figure S2.** Spaced-filled representations of activated materials. (a) **3a**, (b) **4b**, and (c) **4a**. (made by CrystalMaker 2.2)

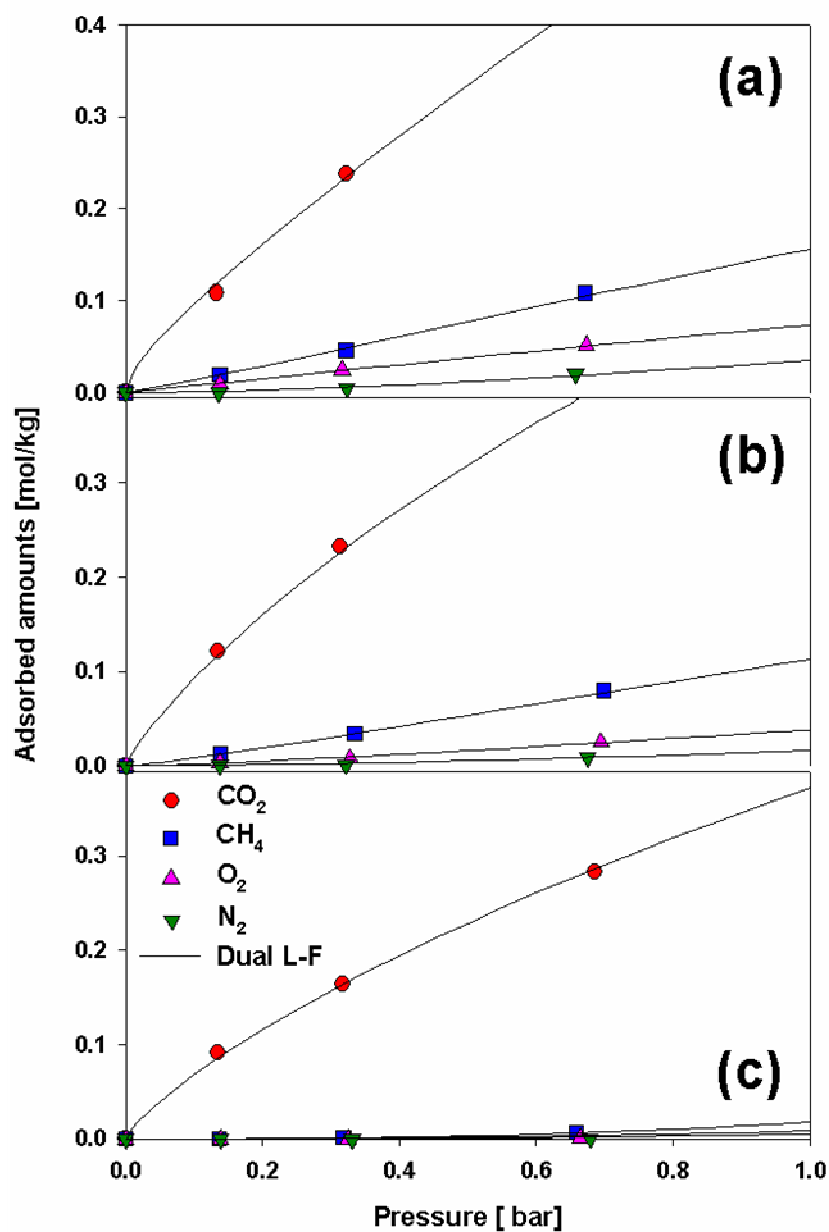

**Figure S3.** (a)-(c) Low-pressure isotherms of CO<sub>2</sub>, CH<sub>4</sub>, O<sub>2</sub>, and N<sub>2</sub> in **3a**, **4a**, and **4b**, respectively. Solid lines indicate fits from the dual-site Langmuir-Freundlich (Dual L-F) equation.

1. O. K. Farha, A. M. Spokoyny, K. L. Mulfort, S. Galli, J. T. Hupp and C. A. Mirkin, *Small*, 2009, **5**, 1727.
